# Supplementary material for: Preparation and characterization of metal–organic frameworks and their composite Eu2O3@[Zn2(bdc)2dabco] (ZBDh) via pulsed laser ablation in a flowing liquid
Source: Royal Society of Chemistry journal article supplement (doi:10.1039/d0ce00038h), 2020-01-01
Supplement: d0ce00038h1.pdf [file d0ce00038h1.pdf]

## Supporting Information

### Preparation and Characterization of Metal-Organic Frameworks and its Composite $\text{Eu}_2\text{O}_3@[\text{Zn}_2(\text{bdc})_2\text{dabco}]$ (ZBDh) via Pulsed Laser

#### Ablation in Flow Liquid

Qianhuo Chen<sup>\*a</sup>, Qing Liu<sup>b</sup>, Yingbing Zou<sup>a</sup>, Lihua Wang<sup>b</sup>, Xiuling Ma<sup>b</sup>, Zhangjing Zhang<sup>b</sup>, Shengchang Xiang<sup>\*b</sup>

<sup>a</sup> Fujian Key Laboratory of Pollution Control & Resource Reuse, College of Environmental Science and Engineering, Fujian Normal University, Fuzhou 350007, China

<sup>b</sup> Fujian Provincial Key Laboratory of Polymer Materials, College of Chemistry and Materials Science, Fujian Normal University, Fuzhou 350007, China

E-mail: scxiang@fjnu.edu.cn; qhchen@fjnu.edu.cn

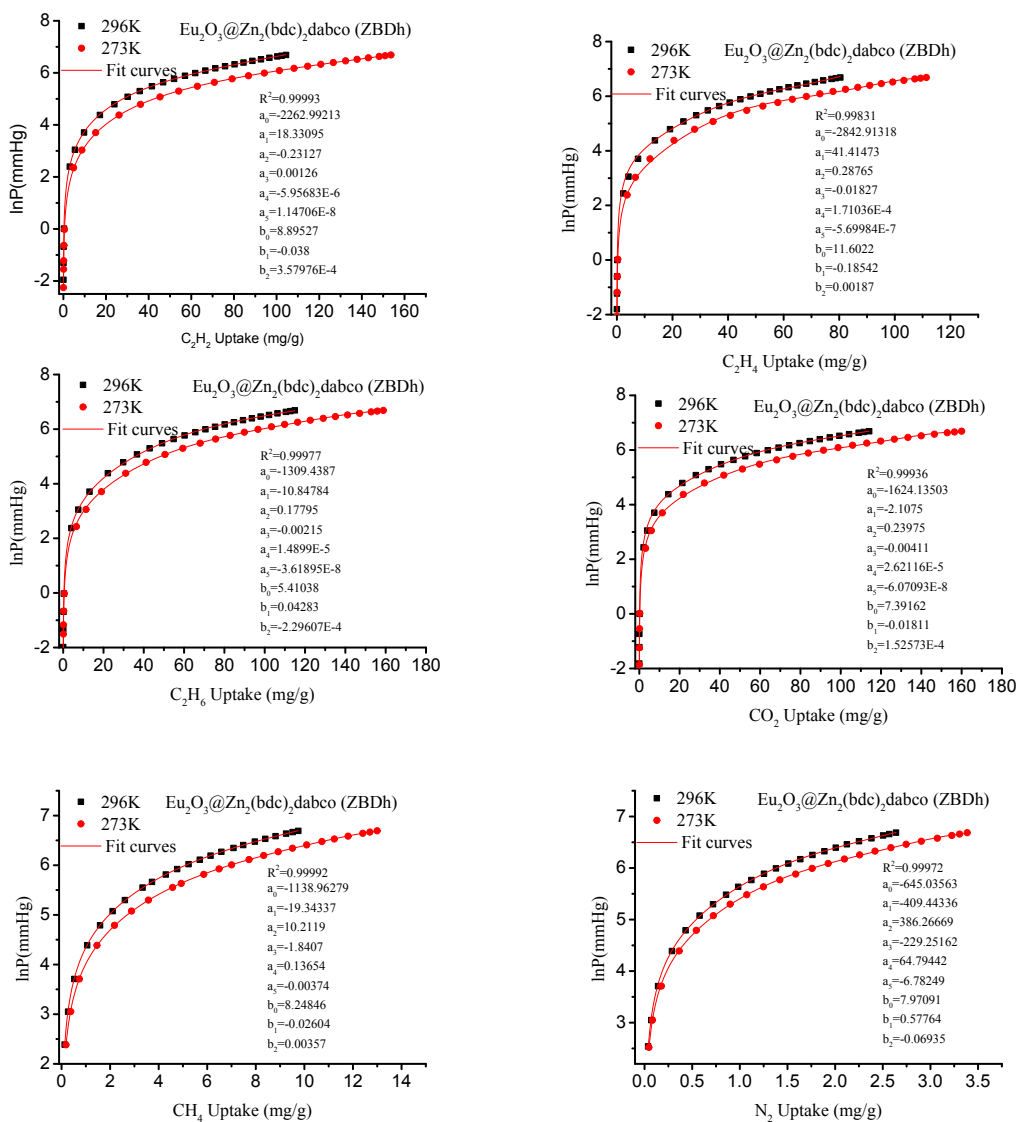

**Figure. S1** The details of virial equation (solid lines) fitting to the experimental  $\text{C}_2\text{H}_2$ (a),  $\text{C}_2\text{H}_4$ (b),  $\text{C}_2\text{H}_6$ (c),  $\text{CO}_2$ (d),  $\text{CH}_4$ (e) and  $\text{N}_2$ (f) adsorption data (symbols) for composite  $\text{Eu}_2\text{O}_3@[\text{Zn}_2(\text{bdc})_2\text{dabco}]$  (ZBDh)(sample 3).

**Table S1** Virial graph analyses data for composite **Eu<sub>2</sub>O<sub>3</sub>@[Zn<sub>2</sub>(bdc)<sub>2</sub>dabco](ZBDh)(sample 3)**

| adsorbate                     | T(K) | A <sub>0</sub> /ln(molg <sup>-1</sup> Pa <sup>-1</sup> ) | A <sub>1</sub> /gmol <sup>-1</sup> | R <sup>2</sup> | K <sub>H</sub> (mol g <sup>-1</sup> Pa <sup>-1</sup> ) |
|-------------------------------|------|----------------------------------------------------------|------------------------------------|----------------|--------------------------------------------------------|
| C <sub>2</sub> H <sub>2</sub> | 296K | -16.65469 ± 0.0063                                       | -112.49875 ± 2.44014               | 0.99718        | 5.847 × 10 <sup>-8</sup>                               |
|                               | 273K | -16.17561 ± 0.01097                                      | -92.49127 ± 3.97657                | 0.99265        | 9.441 × 10 <sup>-8</sup>                               |
| C <sub>2</sub> H <sub>4</sub> | 296K | -16.89201 ± 0.01035                                      | -206.42565 ± 6.19934               | 0.99372        | 4.612 × 10 <sup>-8</sup>                               |
|                               | 273K | -16.40012 ± 0.01634                                      | -216.7058 ± 9.68476                | 0.99206        | 7.542 × 10 <sup>-8</sup>                               |
| C <sub>2</sub> H <sub>6</sub> | 296K | -16.49453 ± 0.01054                                      | -186.47888 ± 4.61228               | 0.99573        | 6.863 × 10 <sup>-8</sup>                               |
|                               | 273K | -16.0403 ± 0.01286                                       | -187.231 ± 5.65232                 | 0.99636        | 1.080 × 10 <sup>-7</sup>                               |
| CO <sub>2</sub>               | 296K | -17.25741 ± 0.0003                                       | -112.36749 ± 0.34469               | 0.99988        | 3.200 × 10 <sup>-8</sup>                               |
|                               | 273K | -16.81623 ± 0.00114                                      | -116.72664 ± 1.06447               | 0.99934        | 4.975 × 10 <sup>-8</sup>                               |
| CH <sub>4</sub>               | 296K | -18.88024 ± 0.0013                                       | -184.29494 ± 4.65521               | 0.99366        | 6.315 × 10 <sup>-9</sup>                               |
|                               | 273K | -18.55902 ± 0.0011                                       | -168.62847 ± 3.85143               | 0.99688        | 8.708 × 10 <sup>-9</sup>                               |
